# Supplementary material
Source: publisher site journal article supplement (https://www.dovepress.com/article/405249)
Supplement: Supplementary file 1 [file get_supplementary_file.php]

**Principal Investigator/Researcher Name and Title:** Deepak P. Edward, MD

**Department and Institution:** Ophthalmology, University of Illinois at Chicago

**Address and Contact Information:** 1855 W. Taylor Street, Chicago, IL, 60612, (312) 996-9120

The purpose of this survey study is to evaluate symptoms of digital eye strain related to online learning since the start of the COVID-19 pandemic. You are being invited to participate in this survey because you are an undergraduate student or medical student at UIC. Your participation in this study is voluntary. Confidentiality will be maintained to the degree permitted by the technology used. Your participation in this online survey involves risks similar to a person’s everyday use of the Internet. We will not collect any identifying information such as your name, email address, or IP address. The data collected will be stored in a protected electronic format. The results of this study will be used to help identify and quantify digital eye strain symptoms, and to identify factors associated with increased digital eye strain.

Your participation in this research is in no way a part of your university duties, and your refusal to participate will not in any way affect your employment with the university, or the benefits, privileges, or opportunities associated with your employment at UIC or UI Health. You will not be offered or receive any special consideration if you participate in this research.

If you are a UIC student, you may choose not to participate or to stop your participation in this research at any time. This will not affect your class standing or grades at UIC. The investigator may also end your participation in the research. If this happens, your class standing, or grades will not be affected. You will not be offered or receive any special consideration if you participate in this research.

- I have read and understand the above information, I certify that I am 18 years old or older and, by clicking the submit button to enter the survey, I indicate my willingness voluntarily take part in the study.
- Submit

**GENERAL BACKGROUND**

1. Are you a:

- Undergraduate student yes/no
  - Program [ free text ]
  - Which year
- Medical student yes/no
  - Which year

2. Approximately how much time do you spend on attending virtual classes?

- Less than 2 hours per day
- 2-4 hours per day
- 4-8 hours per day
- More than 8 hours per day

3. Approximately how much time do you spend on online learning (not including time spent on attending virtual classes)?

- Less than 2 hours per day
- 2-4 hours per day
- 4-8 hours per day
- More than 8 hours per day

4. Approximately how much time do you spend on online since March 2020, compared to prior to March 2020?

- About the same or less
- 25% more
- 50% more
- 100% more

4. What is the most common device you use for online learning?

- Phone
- Tablet
- Laptop
- Desktop
- Other: [ free text ]

5. How many devices do you usually use for online learning? (A computer monitor counts as a separate device)

- 1-2
- 3-4
- > 5

6. Do you wear glasses or contacts during the majority of your study hours?

- Yes, glasses.
- Yes, contacts.
- Neither.

7. At the present time, would you say your eyesight using both eyes (with glasses or contact lenses, if you wear them) is:

- Excellent
- Good
- Fair
- Poor
- Very poor
- Completely blind

8. Do you use blue light glasses?

- Yes
- No

9. Do you use an anti-glare screen on your computer?

- Yes
- No

**Computer Vision Questionnaire**

Indicate whether you experience any of the following ocular symptoms during the time you use the computer at work. For each symptom, mark with an X:

a. First, the frequency, that is, how often the symptom occurs, considering that:

NEVER = the symptom does not occur at all

OCCASIONALLY = sporadic episodes or once a week

OFTEN OR ALWAYS = 2 or 3 times a week or almost every day

b. Second, the intensity of the symptom:

Remember: if you indicated NEVER for frequency, you should not mark anything for intensity.

|  | Frequency | | | Intensity | | Present before COVID? (Y/N) | If present before COVID, has it increased in frequency OR intensity? (Y/N) |
| --- | --- | --- | --- | --- | --- | --- | --- |
|  | Never | Occasionally | Often or Always | Moderate | Intense |
| Eyes Burning |  |  |  |  |  |  |  |
| Eye Itching |  |  |  |  |  |  |  |
| Feeling of a foreign body in eye |  |  |  |  |  |  |  |
| Tearing |  |  |  |  |  |  |  |
| Excessive Blinking |  |  |  |  |  |  |  |
| Eye Redness |  |  |  |  |  |  |  |
| Eye Pain |  |  |  |  |  |  |  |
| Heavy Eyelids |  |  |  |  |  |  |  |
| Dryness |  |  |  |  |  |  |  |
| Blurred Vision |  |  |  |  |  |  |  |
| Double Vision |  |  |  |  |  |  |  |
| Difficulty focusing for near vision |  |  |  |  |  |  |  |
| increased sensitivity to light |  |  |  |  |  |  |  |
| Colored halos around objects |  |  |  |  |  |  |  |
| Feeling that eye sight is worsening |  |  |  |  |  |  |  |
| Headache |  |  |  |  |  |  |  |
